# Supplementary material for: Comparing Data Collection Tools for Zoo Management Decision-Making: A Case Study Examining Behavioral Measures of Humboldt Penguin Bond Strength
Source: MDPI journal article supplement (doi:10.3390/ani12213031), 2022-11-03
Supplement: s1 [file s1]

**Supplemental Table S1.** Results of Dunn's post-hoc tests for activity budgets (Animal Behaviour Pro data). Table includes Z scores and adjusted P values (significant differences highlighted in yellow). See Section 3.1.

| SWIM             |            |       | KENNEL     |       | STAND      |       |
|------------------|------------|-------|------------|-------|------------|-------|
| Comparison       | Z          | P.adj | Z          | P.adj | Z          | P.adj |
| Araya - Blanca   | -2.5605    | 1.000 | -0.7218    | 1.000 | 3.00311012 | 0.281 |
| Araya - Burgess  | -2.2549    | 1.000 | 1.18954643 | 1.000 | 2.60368656 | 0.968 |
| Blanca - Burgess | 0.30561670 | 1.000 | 1.91130983 | 1.000 | -0.399     | 1.000 |
| Araya - Desi     | -5.9515    | 0.000 | 1.18954643 | 1.000 | 4.58494633 | 0.000 |
| Blanca - Desi    | -3.3909    | 0.073 | 1.91130983 | 1.000 | 1.58183622 | 1.000 |
| Burgess - Desi   | -3.6966    | 0.023 | 0.00000000 | 1.000 | 1.98125978 | 1.000 |
| Araya - DJ       | 1.19230727 | 1.000 | -1.9615    | 1.000 | 2.38068333 | 1.000 |
| Blanca - DJ      | 3.75285248 | 0.018 | -1.2398    | 1.000 | -0.622     | 1.000 |
| Burgess - DJ     | 3.44723578 | 0.059 | -3.1511    | 0.171 | -0.223     | 1.000 |
| Desi - DJ        | 7.14379044 | 0.000 | -3.1511    | 0.171 | -2.204     | 1.000 |
| Araya - Gannon   | -2.4057    | 1.000 | -0.2999    | 1.000 | 0.76118435 | 1.000 |
| Blanca - Gannon  | 0.15481899 | 1.000 | 0.42186568 | 1.000 | -2.242     | 1.000 |
| Burgess - Gannon | -0.1508    | 1.000 | -1.4894    | 1.000 | -1.843     | 1.000 |
| Desi - Gannon    | 3.54575695 | 0.041 | -1.4894    | 1.000 | -3.824     | 0.014 |
| DJ - Gannon      | -3.5980    | 0.034 | 1.66163422 | 1.000 | -1.619     | 1.000 |
| Araya - Iggy     | -2.4459    | 1.000 | 0.08035537 | 1.000 | 0.64125817 | 1.000 |
| Blanca - Iggy    | 0.11460626 | 1.000 | 0.80211877 | 1.000 | -2.362     | 1.000 |
| Burgess - Iggy   | -0.1910    | 1.000 | -1.1092    | 1.000 | -1.962     | 1.000 |
| Desi - Iggy      | 3.50554423 | 0.048 | -1.1092    | 1.000 | -3.944     | 0.008 |
| DJ - Iggy        | -3.6382    | 0.029 | 2.04188730 | 1.000 | -1.739     | 1.000 |
| Gannon - Iggy    | -0.0402    | 1.000 | 0.38025308 | 1.000 | -0.12      | 1.000 |
| Araya - Jules    | -3.9949    | 0.007 | 1.17336137 | 1.000 | 3.52075365 | 0.045 |
| Blanca - Jules   | -1.4692    | 1.000 | 1.88530440 | 1.000 | 0.55850408 | 1.000 |
| Burgess - Jules  | -1.7706    | 1.000 | 0.00000000 | 1.000 | 0.95249305 | 1.000 |
| Desi - Jules     | 1.87563134 | 1.000 | 0.00000000 | 1.000 | -1.002     | 1.000 |
| DJ - Jules       | -5.1710    | 0.000 | 3.10820456 | 0.198 | 1.17246207 | 1.000 |
| Gannon - Jules   | -1.6219    | 1.000 | 1.46917866 | 1.000 | 2.76992603 | 0.589 |
| Iggy - Jules     | -1.5822    | 1.000 | 1.09409933 | 1.000 | 2.88822049 | 0.407 |
| Araya - Lou      | -0.5389    | 1.000 | -0.0201    | 1.000 | -0.953     | 1.000 |
| Blanca - Lou     | 2.02169471 | 1.000 | 0.70167455 | 1.000 | -3.957     | 0.008 |
| Burgess - Lou    | 1.71607800 | 1.000 | -1.2096    | 1.000 | -3.557     | 0.039 |
| Desi - Lou       | 5.41263267 | 0.000 | -1.2096    | 1.000 | -5.538     | 0.000 |
| DJ - Lou         | -1.7312    | 1.000 | 1.94144309 | 1.000 | -3.334     | 0.090 |
| Gannon - Lou     | 1.86687572 | 1.000 | 0.27980887 | 1.000 | -1.715     | 1.000 |
| Iggy - Lou       | 1.90708844 | 1.000 | -0.1004    | 1.000 | -1.595     | 1.000 |
| Jules - Lou      | 3.46335663 | 0.056 | -1.1932    | 1.000 | -4.461     | 0.001 |
| Araya - Mario    | -2.6922    | 0.745 | -2.4666    | 1.000 | 2.84552117 | 0.466 |

|                  |            |       |            |       |            |       |
|------------------|------------|-------|------------|-------|------------|-------|
| Blanca - Mario   | -0.1317    | 1.000 | -1.7449    | 1.000 | -0.158     | 1.000 |
| Burgess - Mario  | -0.4373    | 1.000 | -3.6562    | 0.027 | 0.24183461 | 1.000 |
| Desi - Mario     | 3.25924129 | 0.117 | -3.6562    | 0.027 | -1.739     | 1.000 |
| DJ - Mario       | -3.8845    | 0.011 | -0.5051    | 1.000 | 0.46483784 | 1.000 |
| Gannon - Mario   | -0.2865    | 1.000 | -2.1667    | 1.000 | 2.08433682 | 1.000 |
| Iggy - Mario     | -0.2463    | 1.000 | -2.5470    | 1.000 | 2.20426300 | 1.000 |
| Jules - Mario    | 1.33926446 | 1.000 | -3.6064    | 0.033 | -0.714     | 1.000 |
| Lou - Mario      | -2.1534    | 1.000 | -2.4465    | 1.000 | 3.79898385 | 0.015 |
| Araya - Monte    | -1.7844    | 1.000 | -2.8670    | 0.435 | 3.20926421 | 0.140 |
| Blanca - Monte   | 0.77610558 | 1.000 | -2.1452    | 1.000 | 0.20615409 | 1.000 |
| Burgess - Monte  | 0.47048887 | 1.000 | -4.0565    | 0.005 | 0.60557765 | 1.000 |
| Desi - Monte     | 4.16704354 | 0.003 | -4.0565    | 0.005 | -1.376     | 1.000 |
| DJ - Monte       | -2.9767    | 0.306 | -0.9054    | 1.000 | 0.82858088 | 1.000 |
| Gannon - Monte   | 0.62128659 | 1.000 | -2.5671    | 1.000 | 2.44807986 | 1.000 |
| Iggy - Monte     | 0.66149931 | 1.000 | -2.9473    | 0.337 | 2.56800604 | 1.000 |
| Jules - Monte    | 2.23471508 | 1.000 | -4.0013    | 0.007 | -0.355     | 1.000 |
| Lou - Monte      | -1.2456    | 1.000 | -2.8469    | 0.464 | 4.16272689 | 0.003 |
| Mario - Monte    | 0.90780225 | 1.000 | -0.4003    | 1.000 | 0.36374304 | 1.000 |
| Araya - Nino     | -3.4623    | 0.056 | -1.3718    | 1.000 | 3.69888018 | 0.023 |
| Blanca - Nino    | -0.9018    | 1.000 | -0.6500    | 1.000 | 0.69577007 | 1.000 |
| Burgess - Nino   | -1.2074    | 1.000 | -2.5613    | 1.000 | 1.09519362 | 1.000 |
| Desi - Nino      | 2.48916762 | 1.000 | -2.5613    | 1.000 | -0.886     | 1.000 |
| DJ - Nino        | -4.6546    | 0.000 | 0.58975101 | 1.000 | 1.31819685 | 1.000 |
| Gannon - Nino    | -1.0566    | 1.000 | -1.0719    | 1.000 | 2.93769584 | 0.347 |
| Iggy - Nino      | -1.0164    | 1.000 | -1.4521    | 1.000 | 3.05762202 | 0.234 |
| Jules - Nino     | 0.57966848 | 1.000 | -2.5265    | 1.000 | 0.12779929 | 1.000 |
| Lou - Nino       | -2.9235    | 0.363 | -1.3517    | 1.000 | 4.65234287 | 0.000 |
| Mario - Nino     | -0.7701    | 1.000 | 1.09484189 | 1.000 | 0.85335901 | 1.000 |
| Monte - Nino     | -1.6779    | 1.000 | 1.49518382 | 1.000 | 0.48961597 | 1.000 |
| Araya - PJ       | -2.3132    | 1.000 | -0.8107    | 1.000 | 2.88516619 | 0.411 |
| Blanca - PJ      | 0.24730825 | 1.000 | -0.0890    | 1.000 | -0.118     | 1.000 |
| Burgess - PJ     | -0.0583    | 1.000 | -2.0003    | 1.000 | 0.28147963 | 1.000 |
| Desi - PJ        | 3.63824622 | 0.029 | -2.0003    | 1.000 | -1.7       | 1.000 |
| DJ - PJ          | -3.5055    | 0.048 | 1.15080367 | 1.000 | 0.50448285 | 1.000 |
| Gannon - PJ      | 0.09248927 | 1.000 | -0.5108    | 1.000 | 2.12398184 | 1.000 |
| Iggy - PJ        | 0.13270199 | 1.000 | -0.8911    | 1.000 | 2.24390802 | 1.000 |
| Jules - PJ       | 1.71311262 | 1.000 | -1.9731    | 1.000 | -0.675     | 1.000 |
| Lou - PJ         | -1.7744    | 1.000 | -0.7906    | 1.000 | 3.83862887 | 0.013 |
| Mario - PJ       | 0.37900492 | 1.000 | 1.65589455 | 1.000 | 0.03964502 | 1.000 |
| Monte - PJ       | -0.5288    | 1.000 | 2.05623648 | 1.000 | -0.324     | 1.000 |
| Nino - PJ        | 1.14907859 | 1.000 | 0.56105266 | 1.000 | -0.814     | 1.000 |
| Araya - Smitty   | -6.0580    | 0.000 | 1.17336137 | 1.000 | 4.17707605 | 0.003 |
| Blanca - Smitty  | -3.5323    | 0.043 | 1.88530440 | 1.000 | 1.21482648 | 1.000 |
| Burgess - Smitty | -3.8337    | 0.013 | 0.00000000 | 1.000 | 1.60881545 | 1.000 |

|                 |            |       |            |       |            |       |
|-----------------|------------|-------|------------|-------|------------|-------|
| Desi - Smitty   | -0.1875    | 1.000 | 0.00000000 | 1.000 | -0.345     | 1.000 |
| DJ - Smitty     | -7.2341    | 0.000 | 3.10820456 | 0.198 | 1.82878448 | 1.000 |
| Gannon - Smitty | -3.6850    | 0.024 | 1.46917866 | 1.000 | 3.42624844 | 0.064 |
| Iggy - Smitty   | -3.6453    | 0.028 | 1.09409933 | 1.000 | 3.54454289 | 0.041 |
| Jules - Smitty  | -2.0358    | 1.000 | 0.00000000 | 1.000 | 0.64762901 | 1.000 |
| Lou - Smitty    | -5.5265    | 0.000 | 1.19317689 | 1.000 | 5.11756585 | 0.000 |
| Mario - Smitty  | -3.4024    | 0.070 | 3.60642314 | 0.033 | 1.37027126 | 1.000 |
| Monte - Smitty  | -4.2978    | 0.002 | 4.00131798 | 0.007 | 1.01147733 | 1.000 |
| Nino - Smitty   | -2.6428    | 0.863 | 2.52647775 | 1.000 | 0.52852311 | 1.000 |
| PJ - Smitty     | -3.7762    | 0.017 | 1.97305881 | 1.000 | 1.33116565 | 1.000 |
| Araya - Tux     | -1.9634    | 1.000 | 1.18954643 | 1.000 | 2.64234045 | 0.865 |
| Blanca - Tux    | 0.59715895 | 1.000 | 1.91130983 | 1.000 | -0.361     | 1.000 |
| Burgess - Tux   | 0.29154225 | 1.000 | 0.00000000 | 1.000 | 0.03865389 | 1.000 |
| Desi - Tux      | 3.98809692 | 0.007 | 0.00000000 | 1.000 | -1.943     | 1.000 |
| DJ - Tux        | -3.1557    | 0.168 | 3.15107837 | 0.171 | 0.26165712 | 1.000 |
| Gannon - Tux    | 0.44233997 | 1.000 | 1.48944415 | 1.000 | 1.88115611 | 1.000 |
| Iggy - Tux      | 0.48255269 | 1.000 | 1.10919107 | 1.000 | 2.00108228 | 1.000 |
| Jules - Tux     | 2.05820322 | 1.000 | 0.00000000 | 1.000 | -0.914     | 1.000 |
| Lou - Tux       | -1.4245    | 1.000 | 1.20963528 | 1.000 | 3.59580314 | 0.034 |
| Mario - Tux     | 0.72885562 | 1.000 | 3.65616926 | 0.027 | -0.203     | 1.000 |
| Monte - Tux     | -0.1789    | 1.000 | 4.05651118 | 0.005 | -0.567     | 1.000 |
| Nino - Tux      | 1.49892929 | 1.000 | 2.56132736 | 1.000 | -1.057     | 1.000 |
| PJ - Tux        | 0.34985070 | 1.000 | 2.00027470 | 1.000 | -0.243     | 1.000 |
| Smitty - Tux    | 4.12130955 | 0.004 | 0.00000000 | 1.000 | -1.571     | 1.000 |

**Supplemental Table S2.** Results of Dunn's post-hoc tests for proximity (Zoo Monitor data). Table includes Z scores and adjusted P values (significant differences highlighted in yellow). See Section 3.3.

| Pair 1   | Pair 2   | Z score | P adj  |
|----------|----------|---------|--------|
| BLUE     | BROWN    | -4.790  | 0.0000 |
| BLUE     | GREEN    | -4.520  | 0.0001 |
| BROWN    | GREEN    | 0.276   | 1.0000 |
| BLUE     | PURPLE   | -8.820  | 0.0000 |
| BROWN    | PURPLE   | -3.986  | 0.0014 |
| GREEN    | PURPLE   | -4.270  | 0.0004 |
| BLUE     | RED      | -2.748  | 0.1259 |
| BROWN    | RED      | 2.006   | 0.9424 |
| GREEN    | RED      | 1.734   | 1.0000 |
| PURPLE   | RED      | 5.980   | 0.0000 |
| BLUE     | SIBLINGS | -11.857 | 0.0000 |
| BROWN    | SIBLINGS | -6.960  | 0.0000 |
| GREEN    | SIBLINGS | -7.252  | 0.0000 |
| PURPLE   | SIBLINGS | -2.952  | 0.0663 |
| RED      | SIBLINGS | -8.958  | 0.0000 |
| BLUE     | YELLOW   | 1.557   | 1.0000 |
| BROWN    | YELLOW   | 6.264   | 0.0000 |
| GREEN    | YELLOW   | 6.001   | 0.0000 |
| PURPLE   | YELLOW   | 10.239  | 0.0000 |
| RED      | YELLOW   | 4.247   | 0.0005 |
| SIBLINGS | YELLOW   | 13.241  | 0.0000 |

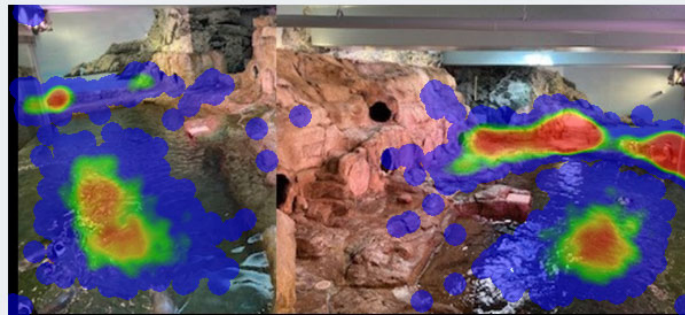

**Figure S1.** Blue pair  
(a) Tux (male)

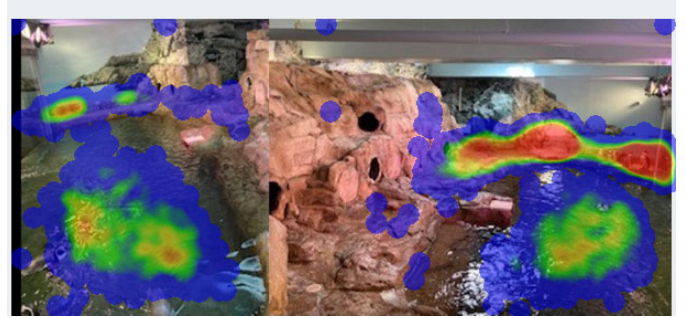

(b) Burgess (female).

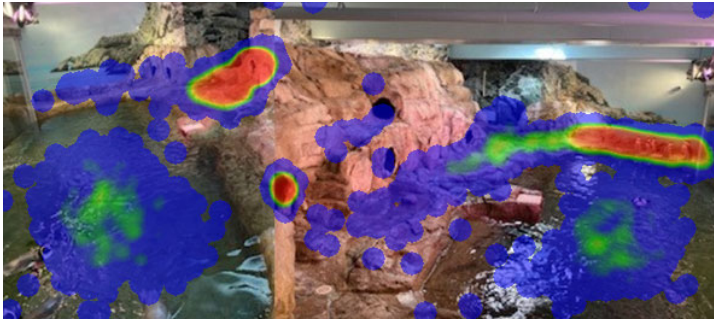

**Figure S2.** Red pair  
(a) Mario (male)

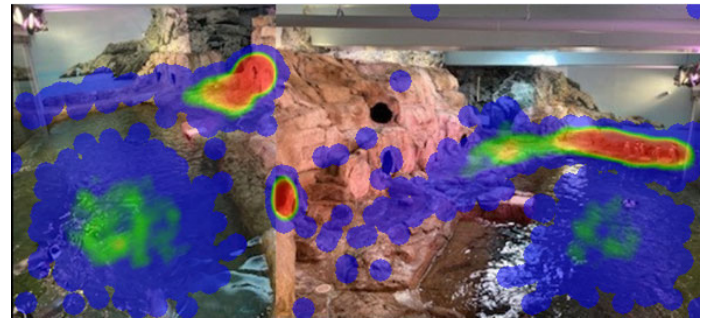

(b) Monte (female).

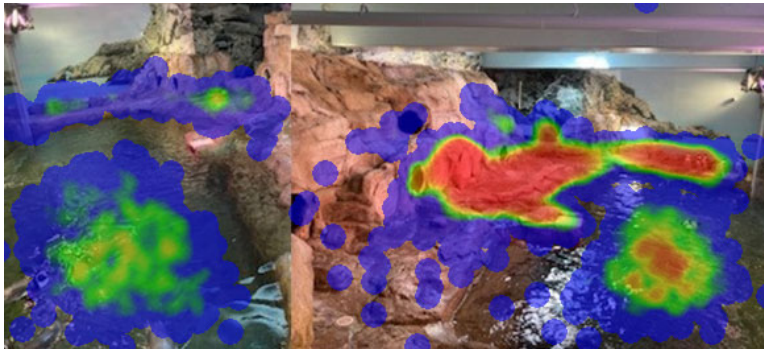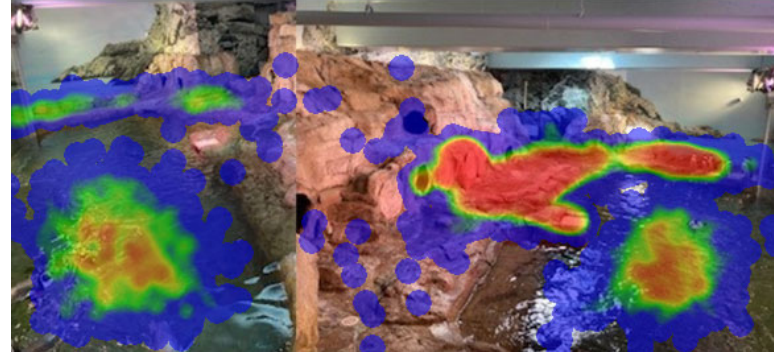

**Figure S3.** Green pair  
(a) Iggy (male)

(b) Gannon (female).



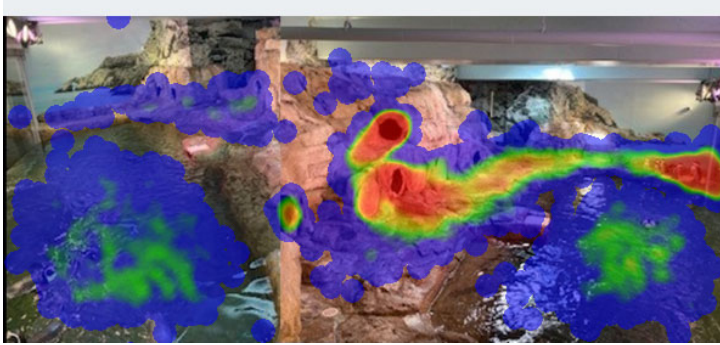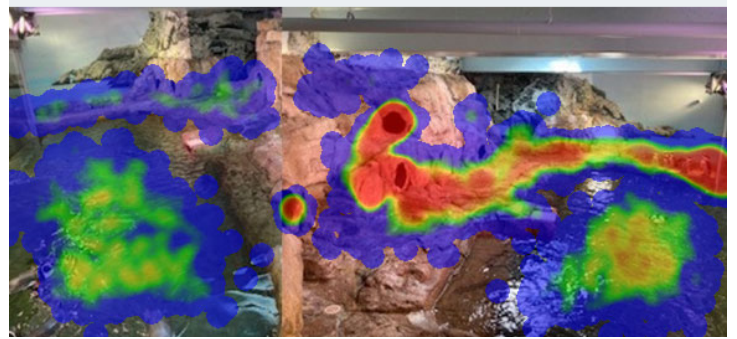

**Figure S4.** Brown pair (a) PJ (male) (b)  
Blanca (female).



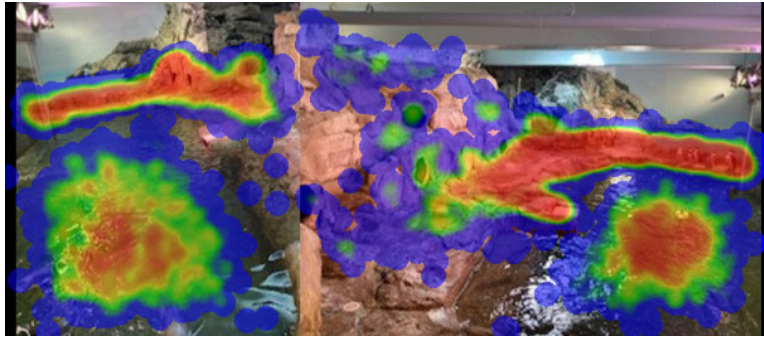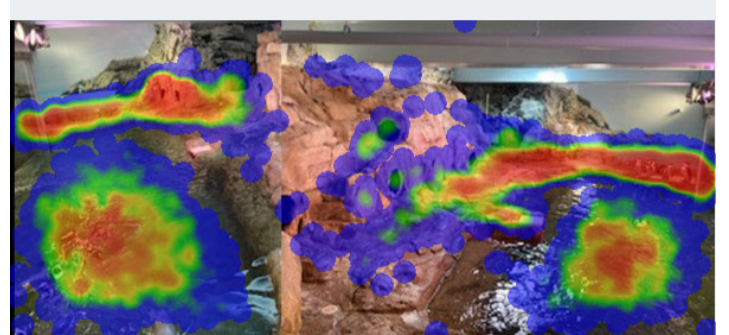

**Figure S5.** Siblings (a) Smitty (male) (b) Jules (female).

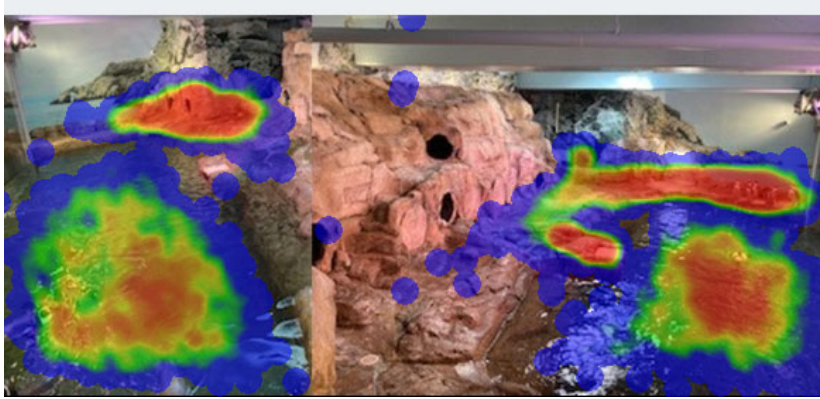

**Figure S6.** Single penguin Desi (male), unpaired.
